# Supplementary material for: A mosaic-type trimeric RBD-based COVID-19 vaccine candidate induces potent neutralization against Omicron and other SARS-CoV-2 variants
Source: eLife journal article supplement (doi:10.7554/elife.78633), 2022-08-23
Supplement: fig1-data1 [file elife-78633-fig1-data1-v2.zip]

Analysis Report: 20211224-4.tif

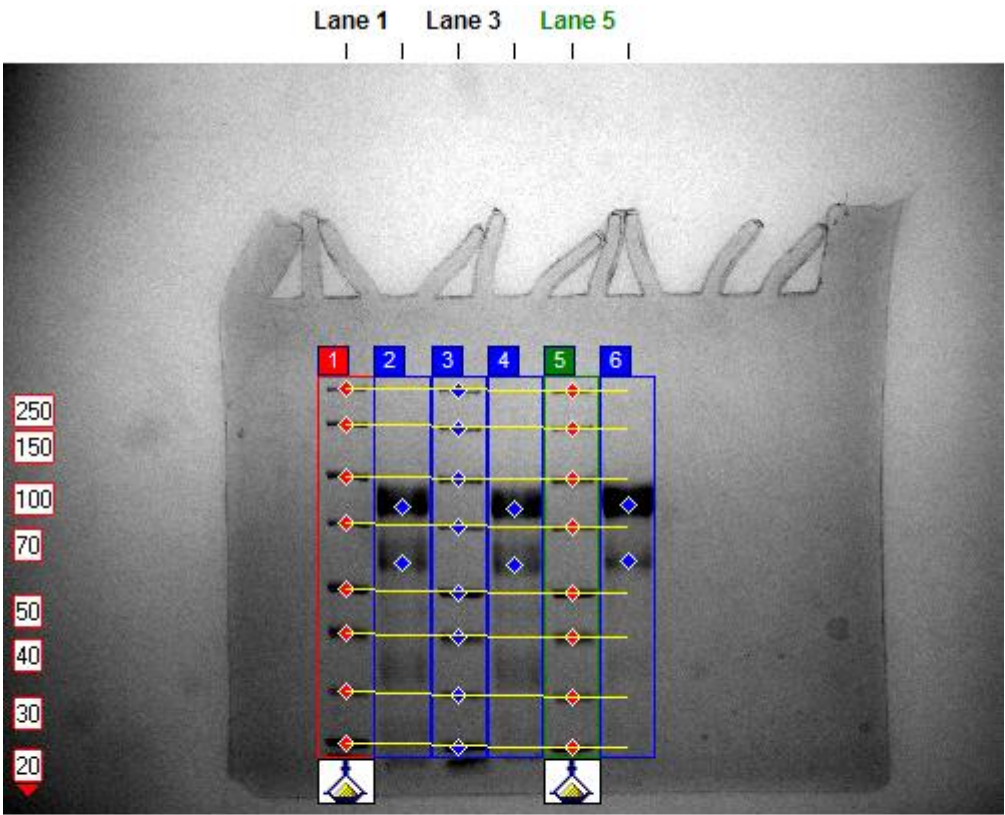

Lane Table

| Lane   | Bands | Band Volume | Lane Volume |
|--------|-------|-------------|-------------|
| Lane 1 | 8     | 48556442.55 | 53952444.72 |
| Lane 2 | 2     | 51042462.03 | 64020396.86 |
| Lane 3 | 8     | 48534114.72 | 53387088.97 |
| Lane 4 | 2     | 55569960.34 | 68873771.44 |
| Lane 5 | 8     | 44157964.42 | 48880860.59 |
| Lane 6 | 2     | 69755415.23 | 77450159.42 |

## Lane Data Report: 20211224-4

.tif, Lane 1

### Summary

Name: Lane 1

### Background

Background Type: Rolling Ball  
Rolling Ball Radius: 200

### Band Detection

Automatic Detection: Yes  
Minimum Band Slope: 50  
Median Filter: 10  
Percentage Maximum Peak: 0  
Maximum Peak Measure: Gel  
Edge Detection Method: Automatic Edges  
Band Positions Edited: No

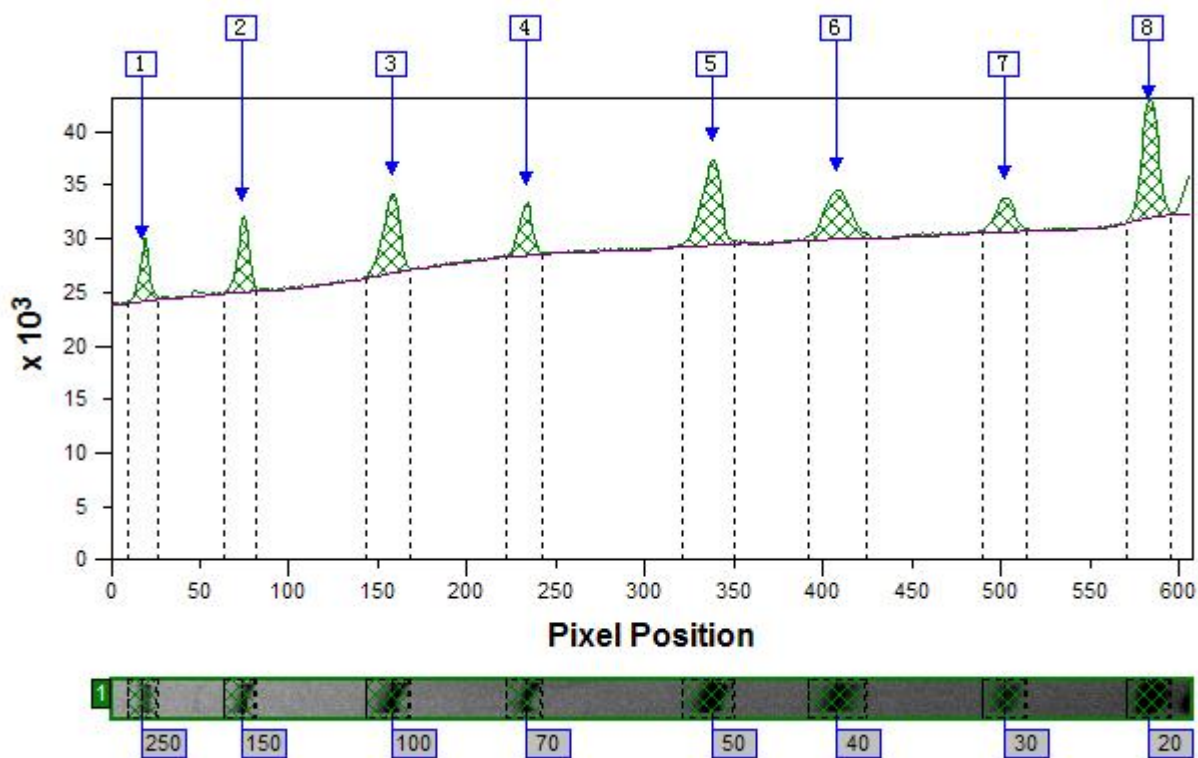

### Band Table

| Band No | Volume      | Band % | MW      |
|---------|-------------|--------|---------|
| 1       | 3284232.74  | 6.764  | 250.000 |
| 2       | 4529559.04  | 9.328  | 150.000 |
| 3       | 7155104.86  | 14.736 | 100.000 |
| 4       | 3739192.00  | 7.701  | 70.000  |
| 5       | 8868695.15  | 18.265 | 50.000  |
| 6       | 6877855.93  | 14.165 | 40.000  |
| 7       | 3558412.00  | 7.328  | 30.000  |
| 8       | 10543390.83 | 21.714 | 20.000  |

## Lane Data Report: 20211224-4

.tif, Lane 2

### Summary

Name: Lane 2

### Background

Background Type: Rolling Ball

Rolling Ball Radius: 200

### Band Detection

Automatic Detection: Yes

Minimum Band Slope: 50

Median Filter: 10

Percentage Maximum Peak: 0

Maximum Peak Measure: Gel

Edge Detection Method: Automatic Edges

Band Positions Edited: No

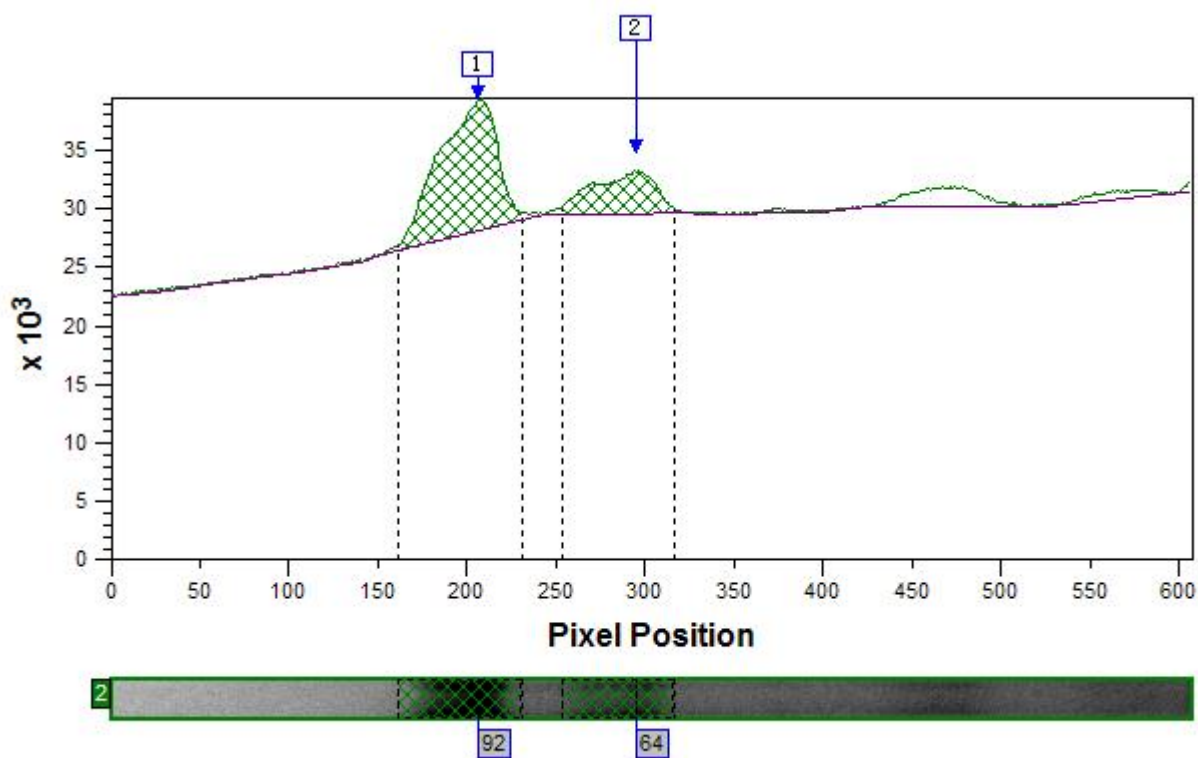

### Band Table

| Band No | Volume      | Band % | MW     |
|---------|-------------|--------|--------|
| 1       | 37891621.92 | 74.235 | 91.995 |
| 2       | 13150840.11 | 25.765 | 63.816 |

## Lane Data Report: 20211224-4

.tif, Lane 3

### Summary

Name: Lane 3

### Background

Background Type: Rolling Ball

Rolling Ball Radius: 200

### Band Detection

Automatic Detection: Yes

Minimum Band Slope: 50

Median Filter: 10

Percentage Maximum Peak: 0

Maximum Peak Measure: Gel

Edge Detection Method: Automatic Edges

Band Positions Edited: No

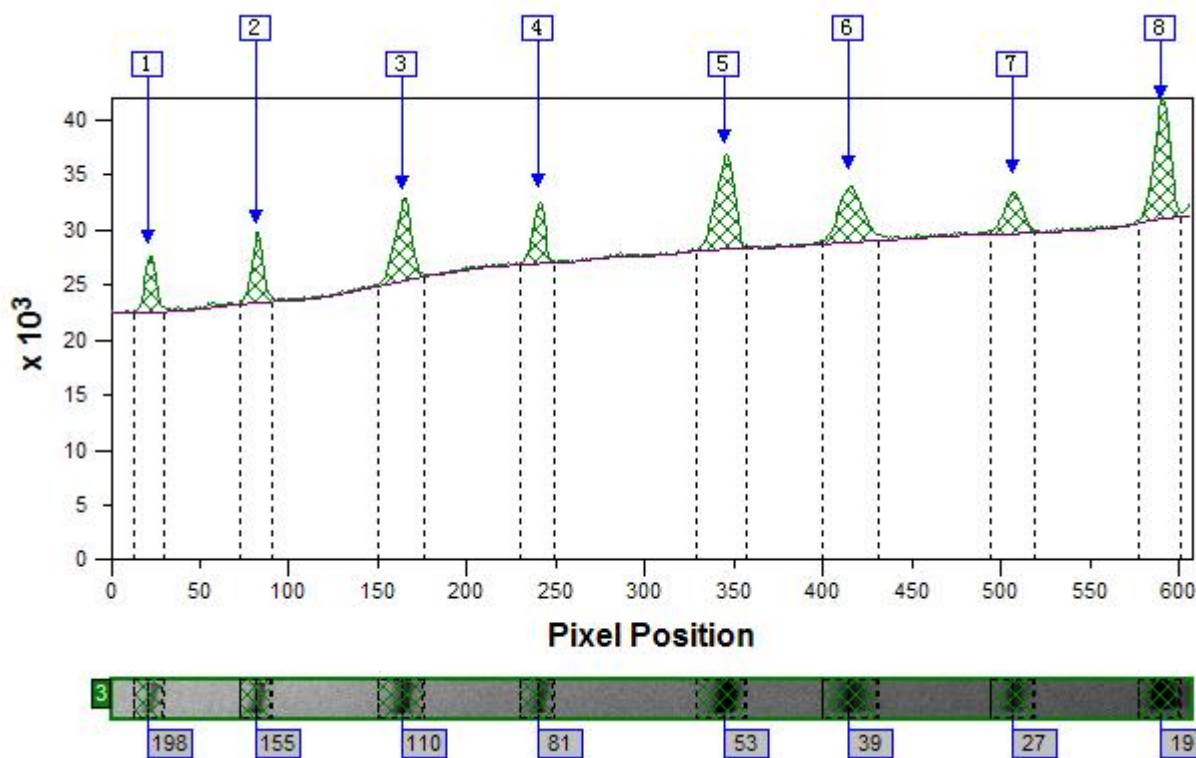

### Band Table

| Band No | Volume     | Band % | MW      |
|---------|------------|--------|---------|
| 1       | 3271629.16 | 6.741  | 197.654 |
| 2       | 4231721.26 | 8.719  | 154.571 |
| 3       | 6991976.00 | 14.406 | 110.458 |
| 4       | 3760080.79 | 7.747  | 80.568  |
| 5       | 9103566.83 | 18.757 | 52.612  |
| 6       | 7137502.00 | 14.706 | 39.492  |
| 7       | 4069637.37 | 8.385  | 27.088  |
| 8       | 9968001.31 | 20.538 | 19.200  |

## Lane Data Report: 20211224-4

.tif, Lane 4

### Summary

Name: Lane 4

### Background

Background Type: Rolling Ball

Rolling Ball Radius: 200

### Band Detection

Automatic Detection: Yes

Minimum Band Slope: 50

Median Filter: 10

Percentage Maximum Peak: 0

Maximum Peak Measure: Gel

Edge Detection Method: Automatic Edges

Band Positions Edited: No

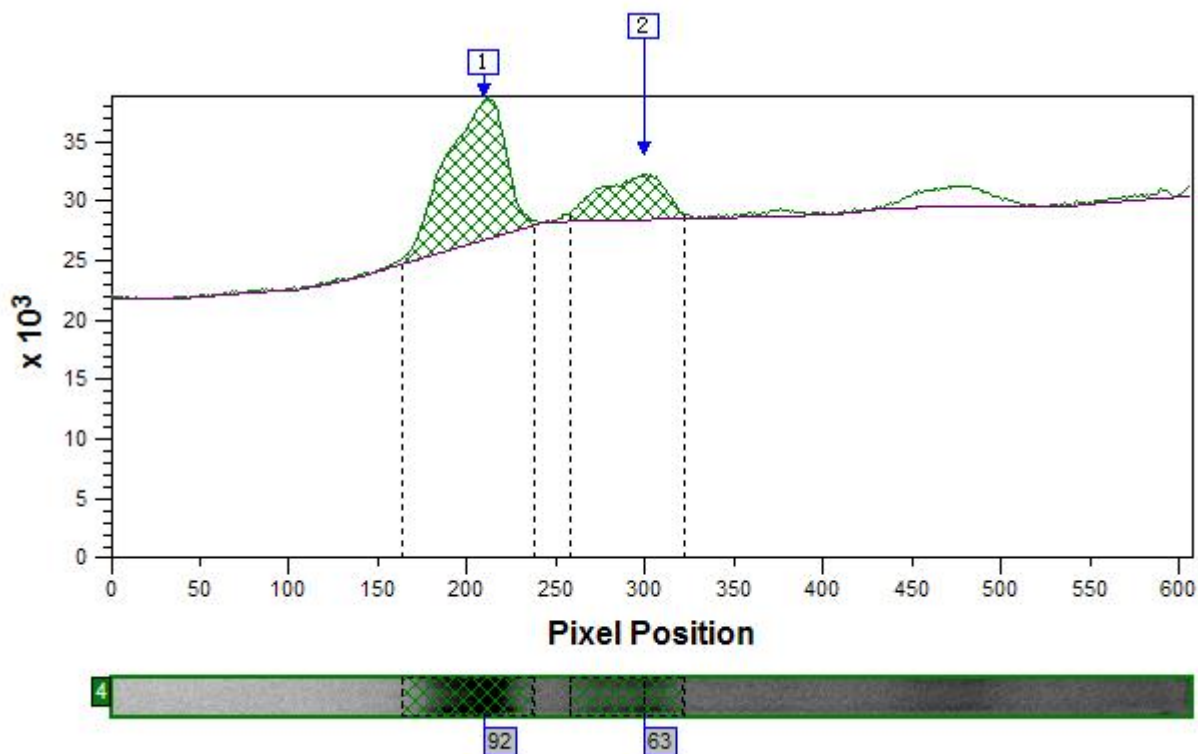

### Band Table

| Band No | Volume      | Band % | MW     |
|---------|-------------|--------|--------|
| 1       | 41222313.97 | 74.181 | 91.651 |
| 2       | 14347646.37 | 25.819 | 63.431 |

## Lane Data Report: 20211224-4

.tif, Lane 5

### Summary

Name: Lane 5

### Background

Background Type: Rolling Ball  
Rolling Ball Radius: 200

### Band Detection

Automatic Detection: Yes  
Minimum Band Slope: 50  
Median Filter: 10  
Percentage Maximum Peak: 0  
Maximum Peak Measure: Gel  
Edge Detection Method: Automatic Edges  
Band Positions Edited: No

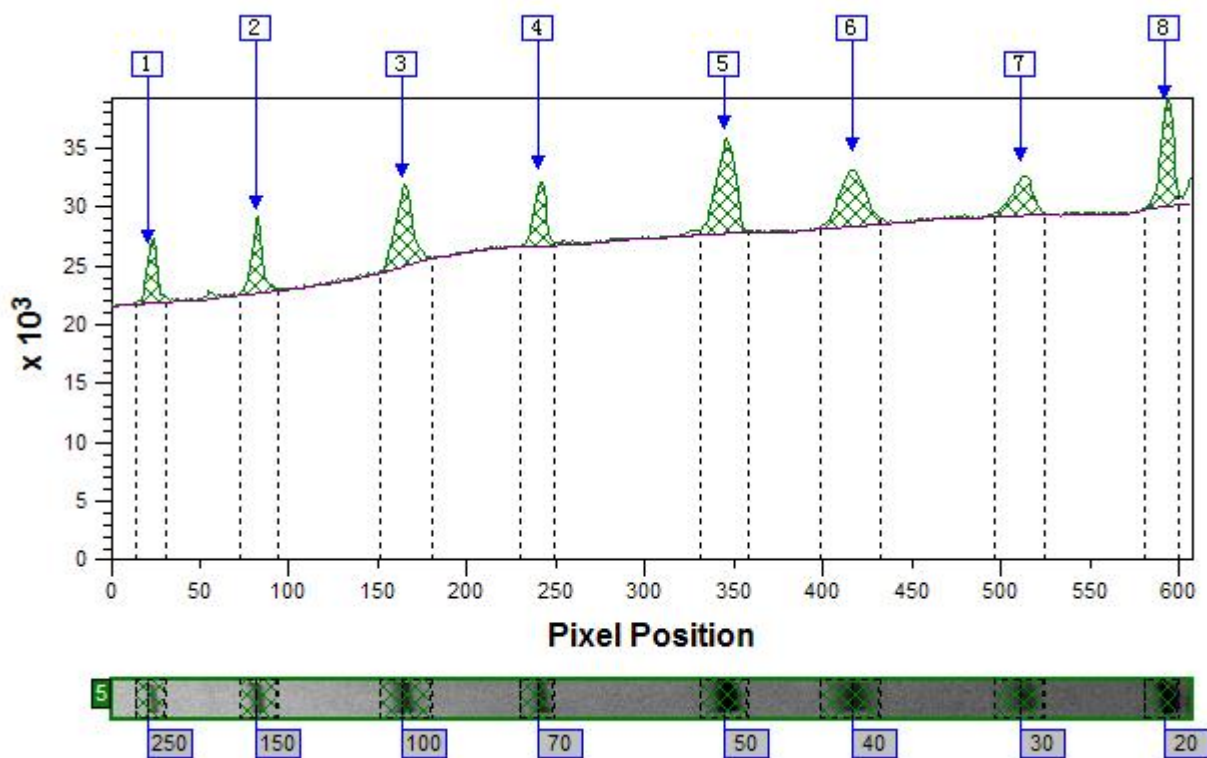

### Band Table

| Band No | Volume     | Band % | MW      |
|---------|------------|--------|---------|
| 1       | 3037533.07 | 6.879  | 250.000 |
| 2       | 3995511.59 | 9.048  | 150.000 |
| 3       | 6787431.32 | 15.371 | 100.000 |
| 4       | 3760815.61 | 8.517  | 70.000  |
| 5       | 8808577.33 | 19.948 | 50.000  |
| 6       | 7249845.25 | 16.418 | 40.000  |
| 7       | 4136339.15 | 9.367  | 30.000  |
| 8       | 6381911.10 | 14.452 | 20.000  |



## Lane Data Report: 20211224-4

.tif, Lane 6

### Summary

Name: Lane 6

### Background

Background Type: Rolling Ball  
Rolling Ball Radius: 200

### Band Detection

Automatic Detection: Yes  
Minimum Band Slope: 50  
Median Filter: 10  
Percentage Maximum Peak: 0  
Maximum Peak Measure: Gel  
Edge Detection Method: Automatic Edges  
Band Positions Edited: No

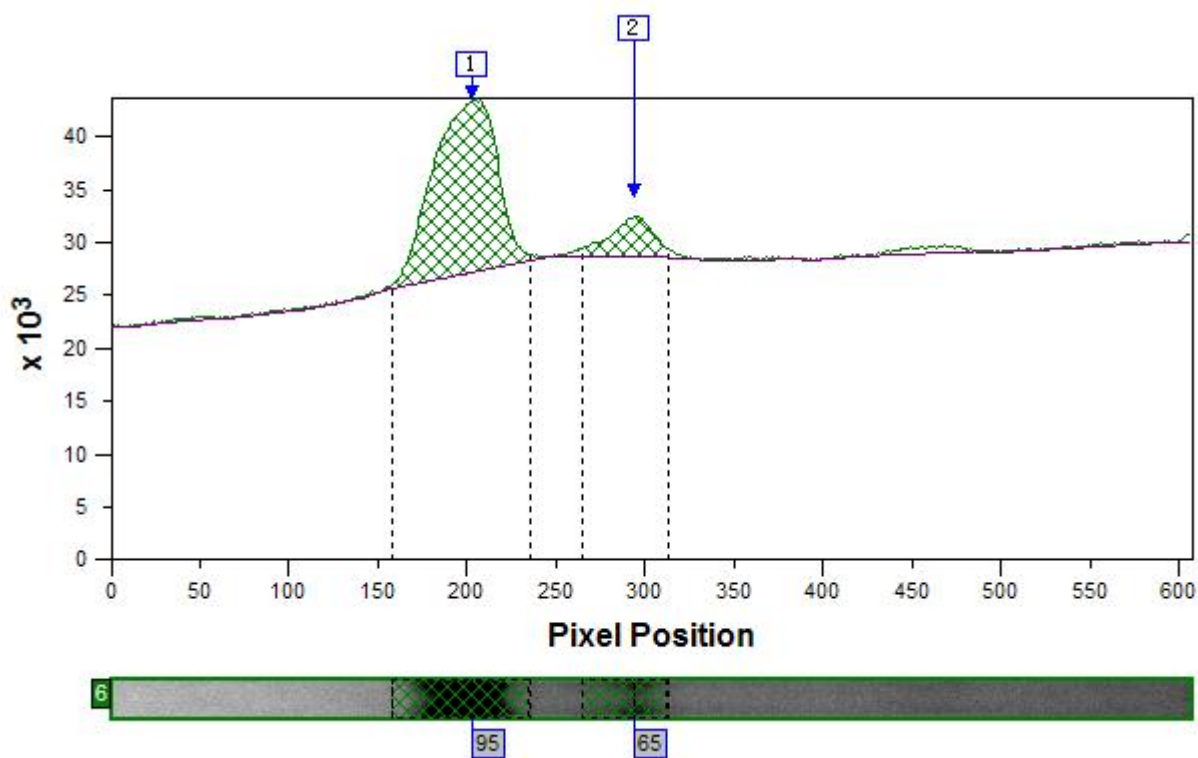

### Band Table

| Band No | Volume      | Band % | MW     |
|---------|-------------|--------|--------|
| 1       | 60352765.23 | 86.521 | 94.898 |
| 2       | 9402650.00  | 13.479 | 65.439 |
