# Supplementary material for: A mosaic-type trimeric RBD-based COVID-19 vaccine candidate induces potent neutralization against Omicron and other SARS-CoV-2 variants
Source: eLife. 2022 Aug 25;11:e78633. doi: 10.7554/eLife.78633 (PMC9481243; doi:10.7554/eLife.78633)
Supplement: Figure 1—source data 2. [file elife-78633-fig1-data2.xlsx]

## Sheet: Sheet1
Fig 1C
Protein concentration (μg/ml)	OD450-630 (nm)
	mos-tri-RBD	prototype His-RBD	Omicron His-RBD	control
1	3.5	2.843	3.028	0.009
0.33	2.95	2.517	2.798	0.014
0.11	2.447	1.49	1.89	0.006
0.037	1.519	0.505	0.557	0.007
0.012	0.64	0.252	0.206	0.007
0.0041	0.218	0.127	0.155	0.006
0.0014	0.077	0.074	0.149	0.007
0.00046	0.033	0.025	0.041	0.002
