# Supplementary material for: A mosaic-type trimeric RBD-based COVID-19 vaccine candidate induces potent neutralization against Omicron and other SARS-CoV-2 variants
Source: eLife. 2022 Aug 25;11:e78633. doi: 10.7554/eLife.78633 (PMC9481243; doi:10.7554/eLife.78633)
Supplement: Figure 2—source data 1. [file elife-78633-fig2-data1.xlsx]

## Sheet: Sheet1
Figure 2B
Virus strain	Vaccine	Rat										GMT
		1	2	3	4	5	6	7	8	9	10
Prototype	Mos-tri-RBD	960	960	1920	960	1920	240	960	960	960	640	922
	Homo-tri-RBD	960	3840	1920	3840	1920	1920	3840	1280	1280	2560	2093
	BBIBP-CorV	480	960	1920	960	960	480	480	240	960	640	699
	Adjuvant control	20	20	20	20	20	20	20	20	20	20	20
Omicron	Mos-tri-RBD	3840	3840	1920	3840	3840	480	3840	2560	7680	2560	2876
	Homo-tri-RBD	120	1920	1280	2560	2560	1280	960	480	960	1920	1077
	BBIBP-CorV	20	30	80	80	60	20	20	20	20	20	31
	Adjuvant control	20	20	20	20	20	20	20	20	20	20	20
Beta	Mos-tri-RBD	7680	15360	10240	5120	10240	3840	10240	5120	10240	1920	6917
	Homo-tri-RBD	320	5120	2560	7680	7680	2560	3840	1280	1920	1920	2547
	BBIBP-CorV	120	320	1920	1920	1280	160	160	120	80	320	328
	Adjuvant control	20	20	20	20	20	20	20	20	20	20	20
Delta	Mos-tri-RBD	5120	10240	10240	5120	10240	5120	7680	3840	3840	1920	5618
	Homo-tri-RBD	960	7680	2560	5120	5120	3840	3840	2560	1920	5120	3360
	BBIBP-CorV	480	640	1920	2560	1920	320	480	320	160	640	655
	Adjuvant control	20	20	20	20	20	20	20	20	20	20	20
