# Supplementary material for: A mosaic-type trimeric RBD-based COVID-19 vaccine candidate induces potent neutralization against Omicron and other SARS-CoV-2 variants
Source: eLife. 2022 Aug 25;11:e78633. doi: 10.7554/eLife.78633 (PMC9481243; doi:10.7554/eLife.78633)
Supplement: Figure 3—source data 1. [file elife-78633-fig3-data1.xlsx]

## Sheet: Sheet1
Figure 3B
Virus strain	Vaccine	Rat										GMT
		1	2	3	4	5	6	7	8	9	10
Prototype	BBIBP-CorV+Mos-tri-RBD	14154	7797	16233	40901	24082	3126	11438	2980	14377	30386	12344
	BBIBP-CorV+Homo-tri-RBD	48486	8736	7901	12591	12522	9468	28175	4431	15963	5422	11836
	BBIBP-CorV+BBIBP-CorV	6482	2950	3264	1683	1137	3469	5702	4012	1409	947	2572
	Adjuvant control	40	40	40	40	40	40	40	40	40	40	40
Omicron (BA.1)	BBIBP-CorV+Mos-tri-RBD	6047	994	1735	8468	4189	617	3973	1622	3407	26169	3249
	BBIBP-CorV+Homo-tri-RBD	1954	285	197	2964	878	3353	2382	1996	1506	72	932
	BBIBP-CorV+BBIBP-CorV	491	133	412	461	74	947	805	2891	75	449	383
	Adjuvant control	40	40	40	40	40	40	40	40	40	40	40
Omicron (BA.2)	BBIBP-CorV+Mos-tri-RBD	1533	543	815	3300	2113	366	1534	807	3142	6501	1459
	BBIBP-CorV+Homo-tri-RBD	463	93	70	1839	653	1348	826	479	656	40	372
	BBIBP-CorV+BBIBP-CorV	442	58	182	402	40	727	181	377	179	40	175
	Adjuvant control	40	40	40	40	40	40	40	40	40	40	40
Omicron (BA.3)	BBIBP-CorV+Mos-tri-RBD	1439	351	588	2938	1533	209	702	412	1018	7823	957
	BBIBP-CorV+Homo-tri-RBD	482	63	79	1085	575	1614	678	436	719	40	340
	BBIBP-CorV+BBIBP-CorV	172	40	93	112	40	242	101	272	125	40	100
	Adjuvant control	40	40	40	40	40	40	40	40	40	40	40
Alpha	BBIBP-CorV+Mos-tri-RBD	16038	19962	53829	12238	13434	3134	8188	2563	18946	38811	12992
	BBIBP-CorV+Homo-tri-RBD	86361	8806	6086	7822	8362	6619	15284	2808	28753	7762	10674
	BBIBP-CorV+BBIBP-CorV	4575	2212	7015	2173	760	2848	5292	3648	3681	1434	2839
	Adjuvant control	40	40	40	40	40	40	40	40	40	40	40
Beta	BBIBP-CorV+Mos-tri-RBD	14843	2565	4597	8696	10909	4060	9045	1411	9943	30138	6936
	BBIBP-CorV+Homo-tri-RBD	2144	622	161	11511	4269	5918	4306	1274	4849	49	1552
	BBIBP-CorV+BBIBP-CorV	514	555	1294	2170	323	3384	415	3710	183	884	859
	Adjuvant control	40	40	40	40	40	40	40	40	40	40	40
Gamma	BBIBP-CorV+Mos-tri-RBD	15730	6118	4202	8747	18229	2925	4859	1844	17652	29040	7830
	BBIBP-CorV+Homo-tri-RBD	4453	1374	782	12880	7348	13512	6055	944	3968	371	2959
	BBIBP-CorV+BBIBP-CorV	1429	2293	4733	1690	192	3380	766	4092	650	2276	1547
	Adjuvant control	40	40	40	40	40	40	40	40	40	40	40
Delta	BBIBP-CorV+Mos-tri-RBD	7700	4496	19861	10063	7396	1689	3357	1501	6932	10782	5640
	BBIBP-CorV+Homo-tri-RBD	4528	2400	1138	3479	3860	2898	3289	1333	3899	664	2364
	BBIBP-CorV+BBIBP-CorV	2235	535	508	904	174	1348	506	860	469	329	622
	Adjuvant control	40	40	40	40	40	40	40	40	40	40	40
Lambda	BBIBP-CorV+Mos-tri-RBD	13080	7271	16296	17137	10205	3596	4971	2824	11117	27139	9153
	BBIBP-CorV+Homo-tri-RBD	2438	4004	1403	13887	6415	3602	8720	1982	4383	1871	3797
	BBIBP-CorV+BBIBP-CorV	3579	338	814	1322	483	2784	1062	2779	674	305	1006
	Adjuvant control	40	40	40	40	40	40	40	40	40	40	40
Mu	BBIBP-CorV+Mos-tri-RBD	3617	2724	3212	5185	6555	1937	3851	1349	5620	20189	4064
	BBIBP-CorV+Homo-tri-RBD	1081	1197	391	8709	3709	3096	2509	481	2436	70	1263
	BBIBP-CorV+BBIBP-CorV	707	566	1173	1292	194	2876	363	2316	208	694	726
	Adjuvant control	40	40	40	40	40	40	40	40	40	40	40
