# Supplementary material for: A mosaic-type trimeric RBD-based COVID-19 vaccine candidate induces potent neutralization against Omicron and other SARS-CoV-2 variants
Source: eLife. 2022 Aug 25;11:e78633. doi: 10.7554/eLife.78633 (PMC9481243; doi:10.7554/eLife.78633)
Supplement: Figure 4—source data 1. [file elife-78633-fig4-data1.xlsx]

## Sheet: Sheet1
Figure 4
Virus strain	Vaccine	Rat										GMT
		1	2	3	4	5	6	7	8	9	10
Prototype	BBIBP-CorV+Mos-tri-RBD	10240	3840	10240	5120	5120	320	2560	640	3840	2560	2975.51
	BBIBP-CorV+Homo-tri-RBD	15360	2560	2560	1280	5120	960	2560	480	2560	480	1986.36
	BBIBP-CorV+BBIBP-CorV	1280	640	2560	480	320	640	1280	480	640	320	694.062
	Adjuvant control	20	20	20	20	20	20	20	20	20	20	20
Omicron	BBIBP-CorV+Mos-tri-RBD	1920	160	240	1280	1920	160	640	240	1280	7680	731.346
	BBIBP-CorV+Homo-tri-RBD	320	60	160	320	240	640	480	80	320	40	193.665
	BBIBP-CorV+BBIBP-CorV	240	20	240	160	20	240	40	240	30	80	85.2962
	Adjuvant control	20	20	20	20	20	20	20	20	20	20	20
Beta	BBIBP-CorV+Mos-tri-RBD	1920	960	1280	1920	1920	640	1280	480	5120	5120	1567.67
	BBIBP-CorV+Homo-tri-RBD	640	240	120	2560	1920	2560	1280	240	640	40	532.233
	BBIBP-CorV+BBIBP-CorV	320	160	640	320	30	640	120	640	80	320	228.955
	Adjuvant control	20	20	20	20	20	20	20	20	20	20	20
Delta	BBIBP-CorV+Mos-tri-RBD	10240	2560	5120	3840	5120	960	1280	640	3840	5120	2891.13
	BBIBP-CorV+Homo-tri-RBD	2560	640	640	1920	10240	2560	960	1280	1920	640	1549.32
	BBIBP-CorV+BBIBP-CorV	640	160	480	320	160	480	160	640	160	160	281.877
	Adjuvant control	20	20	20	20	20	20	20	20	20	20	20
